# Supplementary material for: A Cross-Sectional Study of the Relationship between Cortical Bone and High-Impact Activity in Young Adult Males and Females
Source: PubMed Central journal article supplement — J Clin Endocrinol Metab. 2012 Jul 16;97(10):3734–43. doi: 10.1210/jc.2012-1752 (PMC3462937; doi:10.1210/jc.2012-1752), 2012-07-16
Supplement: supp_jc.2012-1752_12-1752_supp_tabs.pdf [file supp_jc.2012-1752_12-1752_supp_tabs.pdf]

**Supplementary Table 1 Descriptive statistics of participants and the remainder of the cohort**

| Characteristic        | Participants |      |      | Remainder of cohort |      |     |
|-----------------------|--------------|------|------|---------------------|------|-----|
|                       | N            | mean | SD   | N                   | mean | SD  |
| Age (yrs)             | 626          | 9.8  | 0.3  | 6997                | 9.9  | 0.3 |
| Height (m)            | 602          | 1.4  | 0.1  | 6745                | 1.4  | 0.1 |
| BMI                   | 602          | 17.3 | 2.6  | 6745                | 17.8 | 2.9 |
| Fat mass (Kg)         | 593          | 8.1  | 4.6  | 6649                | 8.6  | 5.2 |
| Lean mass (Kg)        | 593          | 24.1 | 2.9  | 6649                | 24.6 | 3.3 |
|                       | N            | %    |      | N                   | %    |     |
| Maternal social class | I            | 49   | 8.9  | 542                 | 5.7  |     |
|                       | II           | 191  | 34.8 | 2,951               | 31.3 |     |
|                       | III †        | 238  | 43.4 | 4,036               | 42.7 |     |
|                       | III ‡        | 27   | 4.9  | 756                 | 8.0  |     |
|                       | IV           | 36   | 6.6  | 947                 | 10.0 |     |
|                       | V            | 8    | 1.5  | 212                 | 2.2  |     |
| <b>Total</b>          | <b>549</b>   |      |      | <b>9444</b>         |      |     |

Comparison of age, gender, height, body composition and maternal social class between the study population and ALSPAC as a whole. Age, gender, height and body composition are based on attendees to the first research clinic for the whole cohort (age 9.8 years). Maternal social class is based on questionnaire data at 32 weeks gestation. †=non-manual ‡=manual

**Supplemental Table 2 Association between physical activity and bone strength indices**

| Outcome                 | g-band | Sex | Model 1        |        |        |       |       | Model 2 |                |        |        |       |       |         |
|-------------------------|--------|-----|----------------|--------|--------|-------|-------|---------|----------------|--------|--------|-------|-------|---------|
|                         |        |     | R <sup>2</sup> | β      | 95% CI |       | p     | p(int.) | R <sup>2</sup> | β      | 95% CI |       | p     | p(int.) |
| Buckling Ratio          | Low    | M   | 0.05           | 0.078  | -0.029 | 0.186 | 0.154 |         | 0.06           | 0.081  | -0.027 | 0.189 | 0.141 |         |
|                         |        | F   | 0.06           | -0.037 | -0.139 | 0.065 | 0.474 |         | 0.06           | -0.032 | -0.136 | 0.072 | 0.542 |         |
|                         |        | All | 0.05           | 0.017  | -0.057 | 0.090 | 0.659 | 0.115   | 0.06           | 0.022  | -0.052 | 0.096 | 0.561 | 0.132   |
|                         | Medium | M   | 0.04           | 0.001  | -0.078 | 0.080 | 0.976 |         | 0.05           | 0.003  | -0.076 | 0.082 | 0.944 |         |
|                         |        | F   | 0.06           | -0.046 | -0.111 | 0.020 | 0.169 |         | 0.06           | -0.045 | -0.114 | 0.024 | 0.200 |         |
|                         |        | All | 0.05           | -0.027 | -0.078 | 0.023 | 0.283 | 0.358   | 0.06           | -0.023 | -0.074 | 0.028 | 0.380 | 0.414   |
|                         | High   | M   | 0.04           | 0.001  | -0.070 | 0.073 | 0.970 |         | 0.05           | 0.004  | -0.068 | 0.076 | 0.905 |         |
|                         |        | F   | 0.06           | -0.035 | -0.092 | 0.022 | 0.225 |         | 0.06           | -0.034 | -0.093 | 0.024 | 0.250 |         |
|                         |        | All | 0.05           | -0.022 | -0.066 | 0.023 | 0.338 | 0.431   | 0.06           | -0.018 | -0.063 | 0.027 | 0.433 | 0.472   |
| CSMI (cm <sup>4</sup> ) | Low    | M   | 0.16           | -0.035 | -0.128 | 0.059 | 0.468 |         | 0.37           | -0.045 | -0.126 | 0.037 | 0.281 |         |
|                         |        | F   | 0.22           | -0.014 | -0.072 | 0.044 | 0.627 |         | 0.41           | 0.002  | -0.050 | 0.054 | 0.940 |         |
|                         |        | All | 0.53           | -0.023 | -0.075 | 0.029 | 0.384 | 0.690   | 0.64           | -0.026 | -0.071 | 0.020 | 0.268 | 0.482   |
|                         | Medium | M   | 0.16           | 0.044  | -0.024 | 0.112 | 0.201 |         | 0.37           | 0.039  | -0.021 | 0.098 | 0.202 |         |
|                         |        | F   | 0.22           | -0.009 | -0.047 | 0.028 | 0.621 |         | 0.41           | -0.015 | -0.049 | 0.019 | 0.386 |         |
|                         |        | All | 0.53           | 0.013  | -0.022 | 0.049 | 0.461 | 0.146   | 0.64           | 0.002  | -0.029 | 0.034 | 0.893 | 0.037   |
|                         | High   | M   | 0.18           | 0.072  | 0.010  | 0.133 | 0.023 |         | 0.38           | 0.054  | 0.000  | 0.108 | 0.049 |         |
|                         |        | F   | 0.22           | 0.022  | -0.010 | 0.054 | 0.176 |         | 0.41           | 0.010  | -0.019 | 0.039 | 0.509 |         |
|                         |        | All | 0.53           | 0.042  | 0.011  | 0.073 | 0.009 | 0.135   | 0.64           | 0.023  | -0.004 | 0.051 | 0.099 | 0.060   |
| SSI                     | Low    | M   | 0.15           | -0.043 | -0.135 | 0.049 | 0.357 |         | 0.36           | -0.054 | -0.134 | 0.026 | 0.187 |         |
|                         |        | F   | 0.21           | -0.019 | -0.084 | 0.045 | 0.552 |         | 0.38           | -0.002 | -0.060 | 0.056 | 0.936 |         |
|                         |        | All | 0.50           | -0.030 | -0.084 | 0.024 | 0.274 | 0.681   | 0.61           | -0.033 | -0.081 | 0.015 | 0.173 | 0.488   |
|                         | Medium | M   | 0.15           | 0.045  | -0.022 | 0.112 | 0.186 |         | 0.36           | 0.039  | -0.020 | 0.097 | 0.192 |         |
|                         |        | F   | 0.21           | -0.008 | -0.049 | 0.034 | 0.716 |         | 0.38           | -0.013 | -0.052 | 0.025 | 0.491 |         |
|                         |        | All | 0.50           | 0.014  | -0.023 | 0.051 | 0.451 | 0.166   | 0.61           | 0.003  | -0.030 | 0.035 | 0.877 | 0.047   |
|                         | High   | M   | 0.17           | 0.070  | 0.010  | 0.131 | 0.023 |         | 0.37           | 0.053  | 0.000  | 0.106 | 0.049 |         |
|                         |        | F   | 0.21           | 0.028  | -0.008 | 0.063 | 0.129 |         | 0.38           | 0.015  | -0.018 | 0.047 | 0.377 |         |
|                         |        | All | 0.50           | 0.044  | 0.012  | 0.076 | 0.007 | 0.218   | 0.61           | 0.025  | -0.003 | 0.054 | 0.085 | 0.117   |

Table showing results from regression analysis between buckling ratio, cross-sectional moment of inertia (CSMI), strength-strain index (SSI) and physical activity within three bands of impact in 272 males and 403 females. (Low= 0.5 – 2.1g; Medium= 2.1 – 4.2g; High= 4.2g+).  $\beta$  coefficient represents SD change in outcome per doubling in activity. Model 1 is adjusted for age, gender and height. Model 2 is additionally adjusted for fat mass and lean mass. p(int.) represents a p-value for interaction of gender and activity.
